# Supplementary figures and images for: The Transcriptomes of Xiphinema index and Longidorus elongatus Suggest Independent Acquisition of Some Plant Parasitism Genes by Horizontal Gene Transfer in Early-Branching Nematodes
Source: MDPI journal article supplement (doi:10.3390/genes8100287), 2017-10-23

A

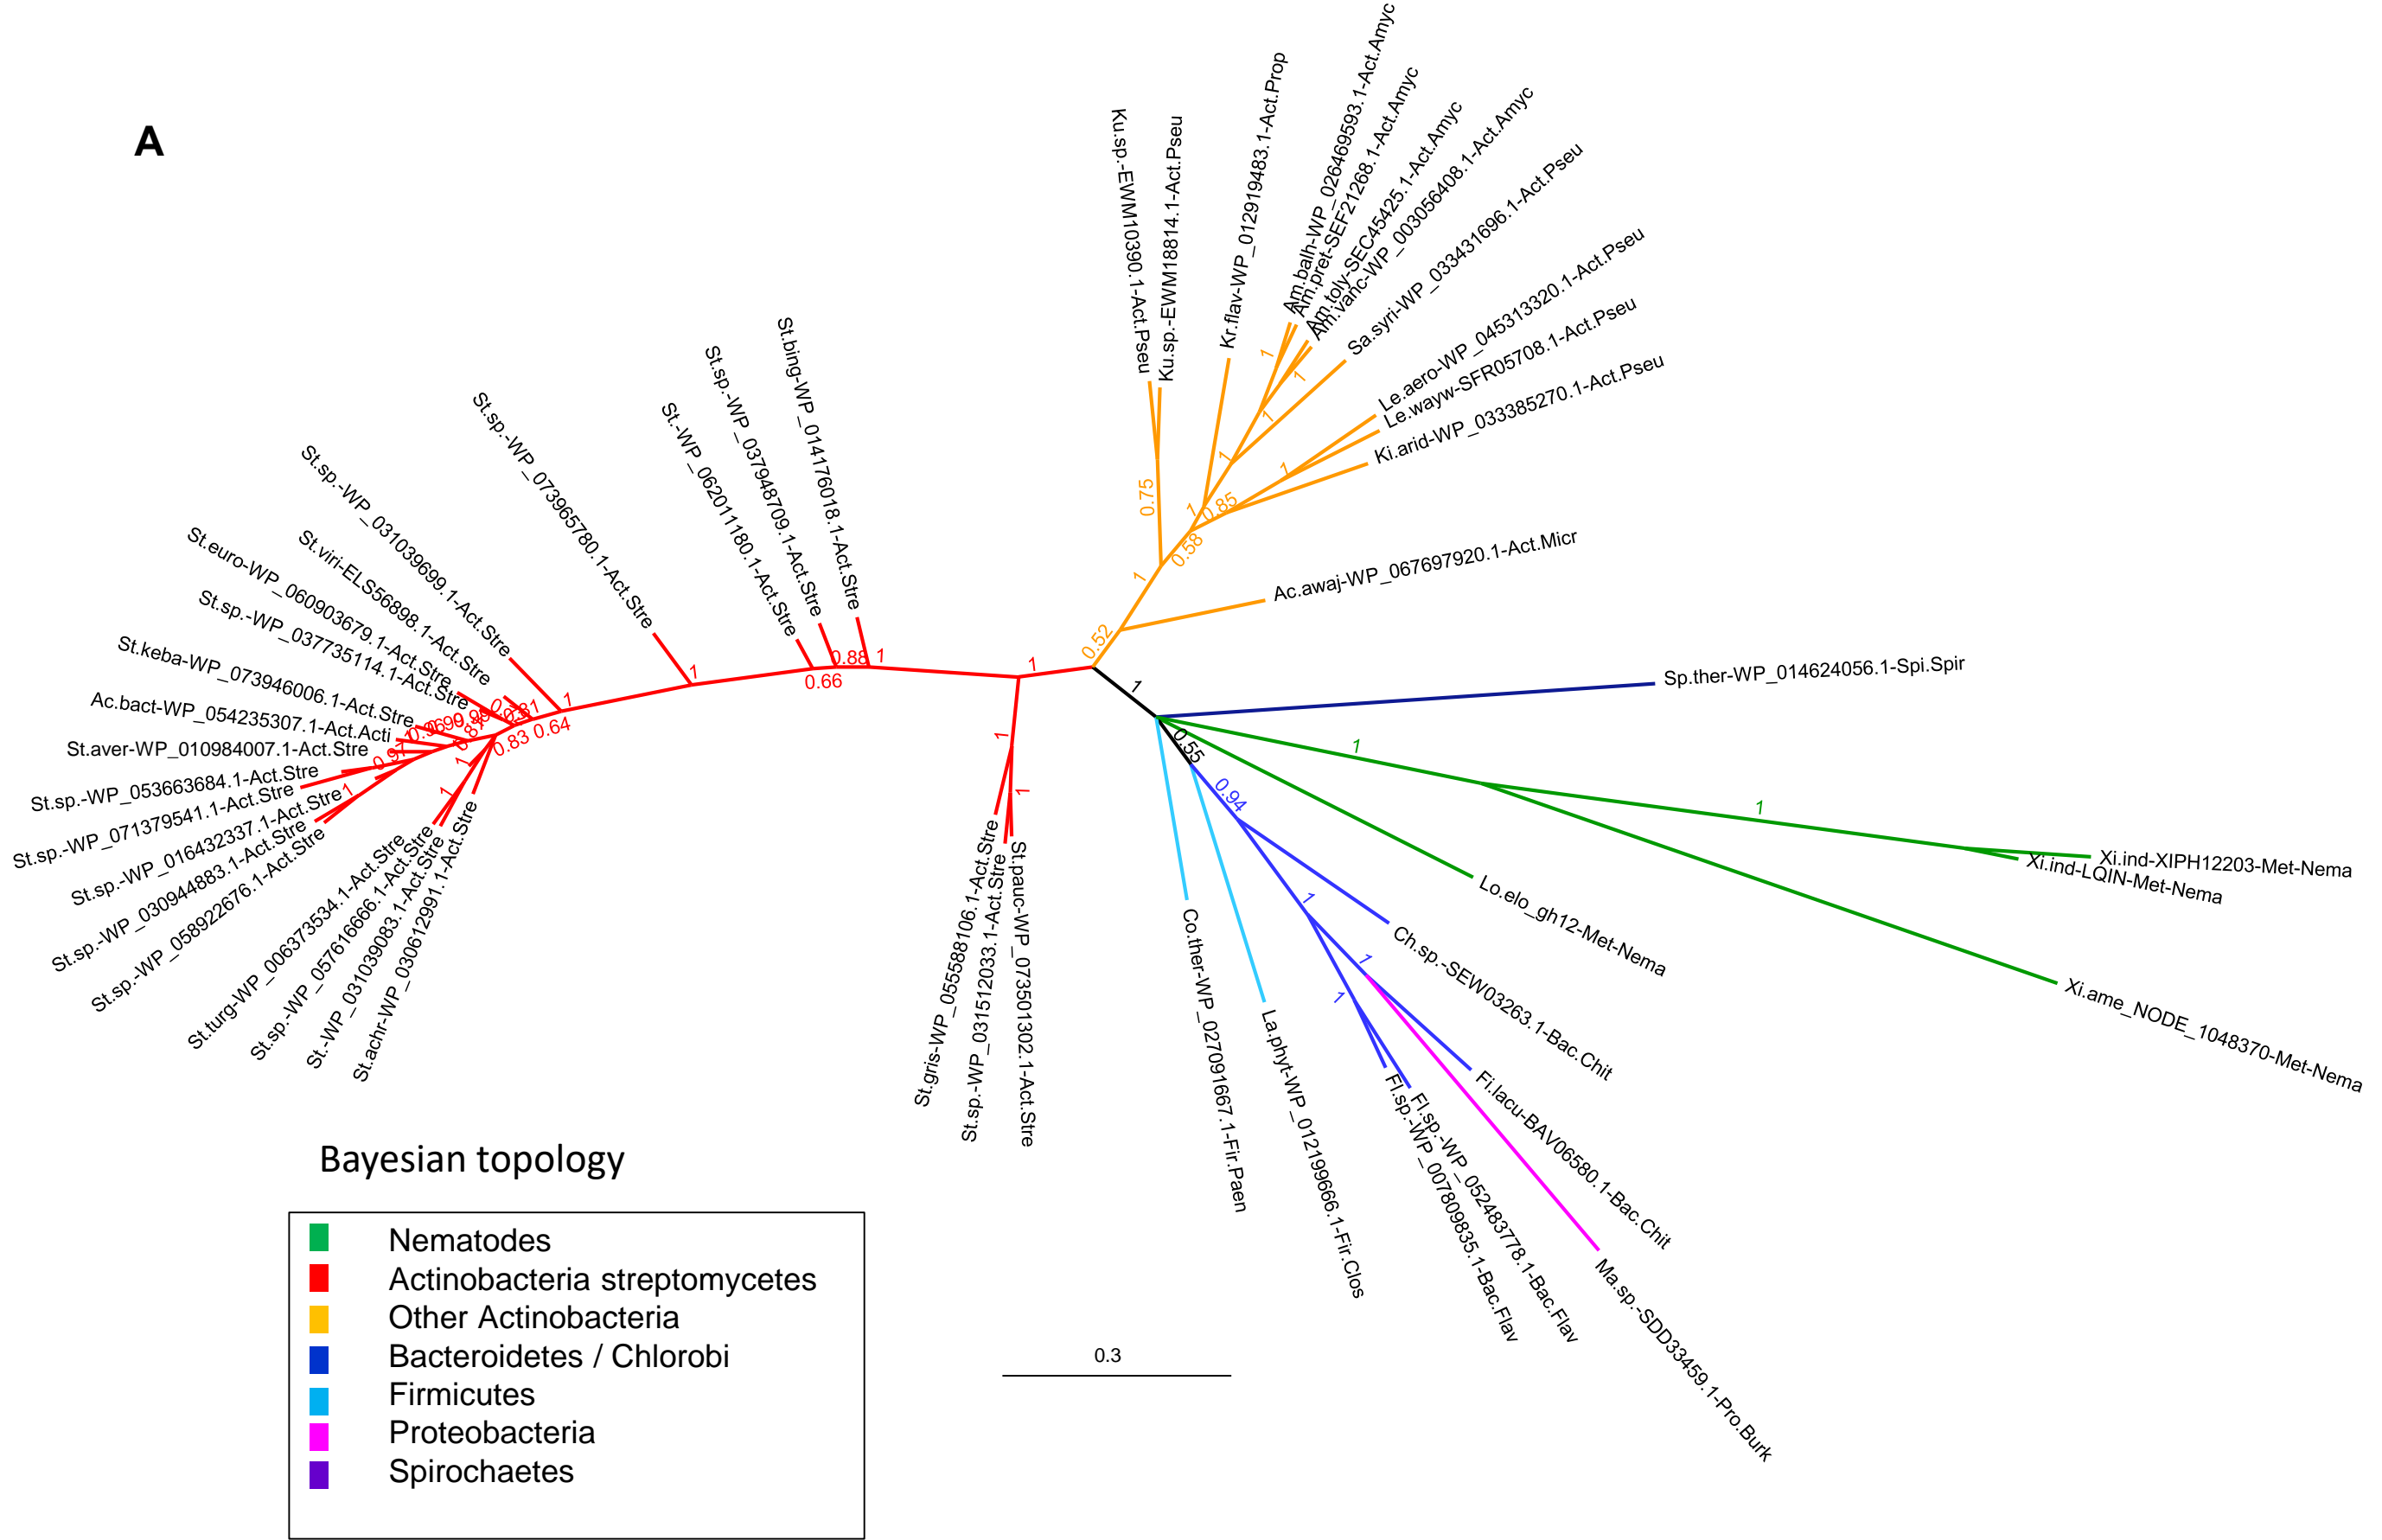

B

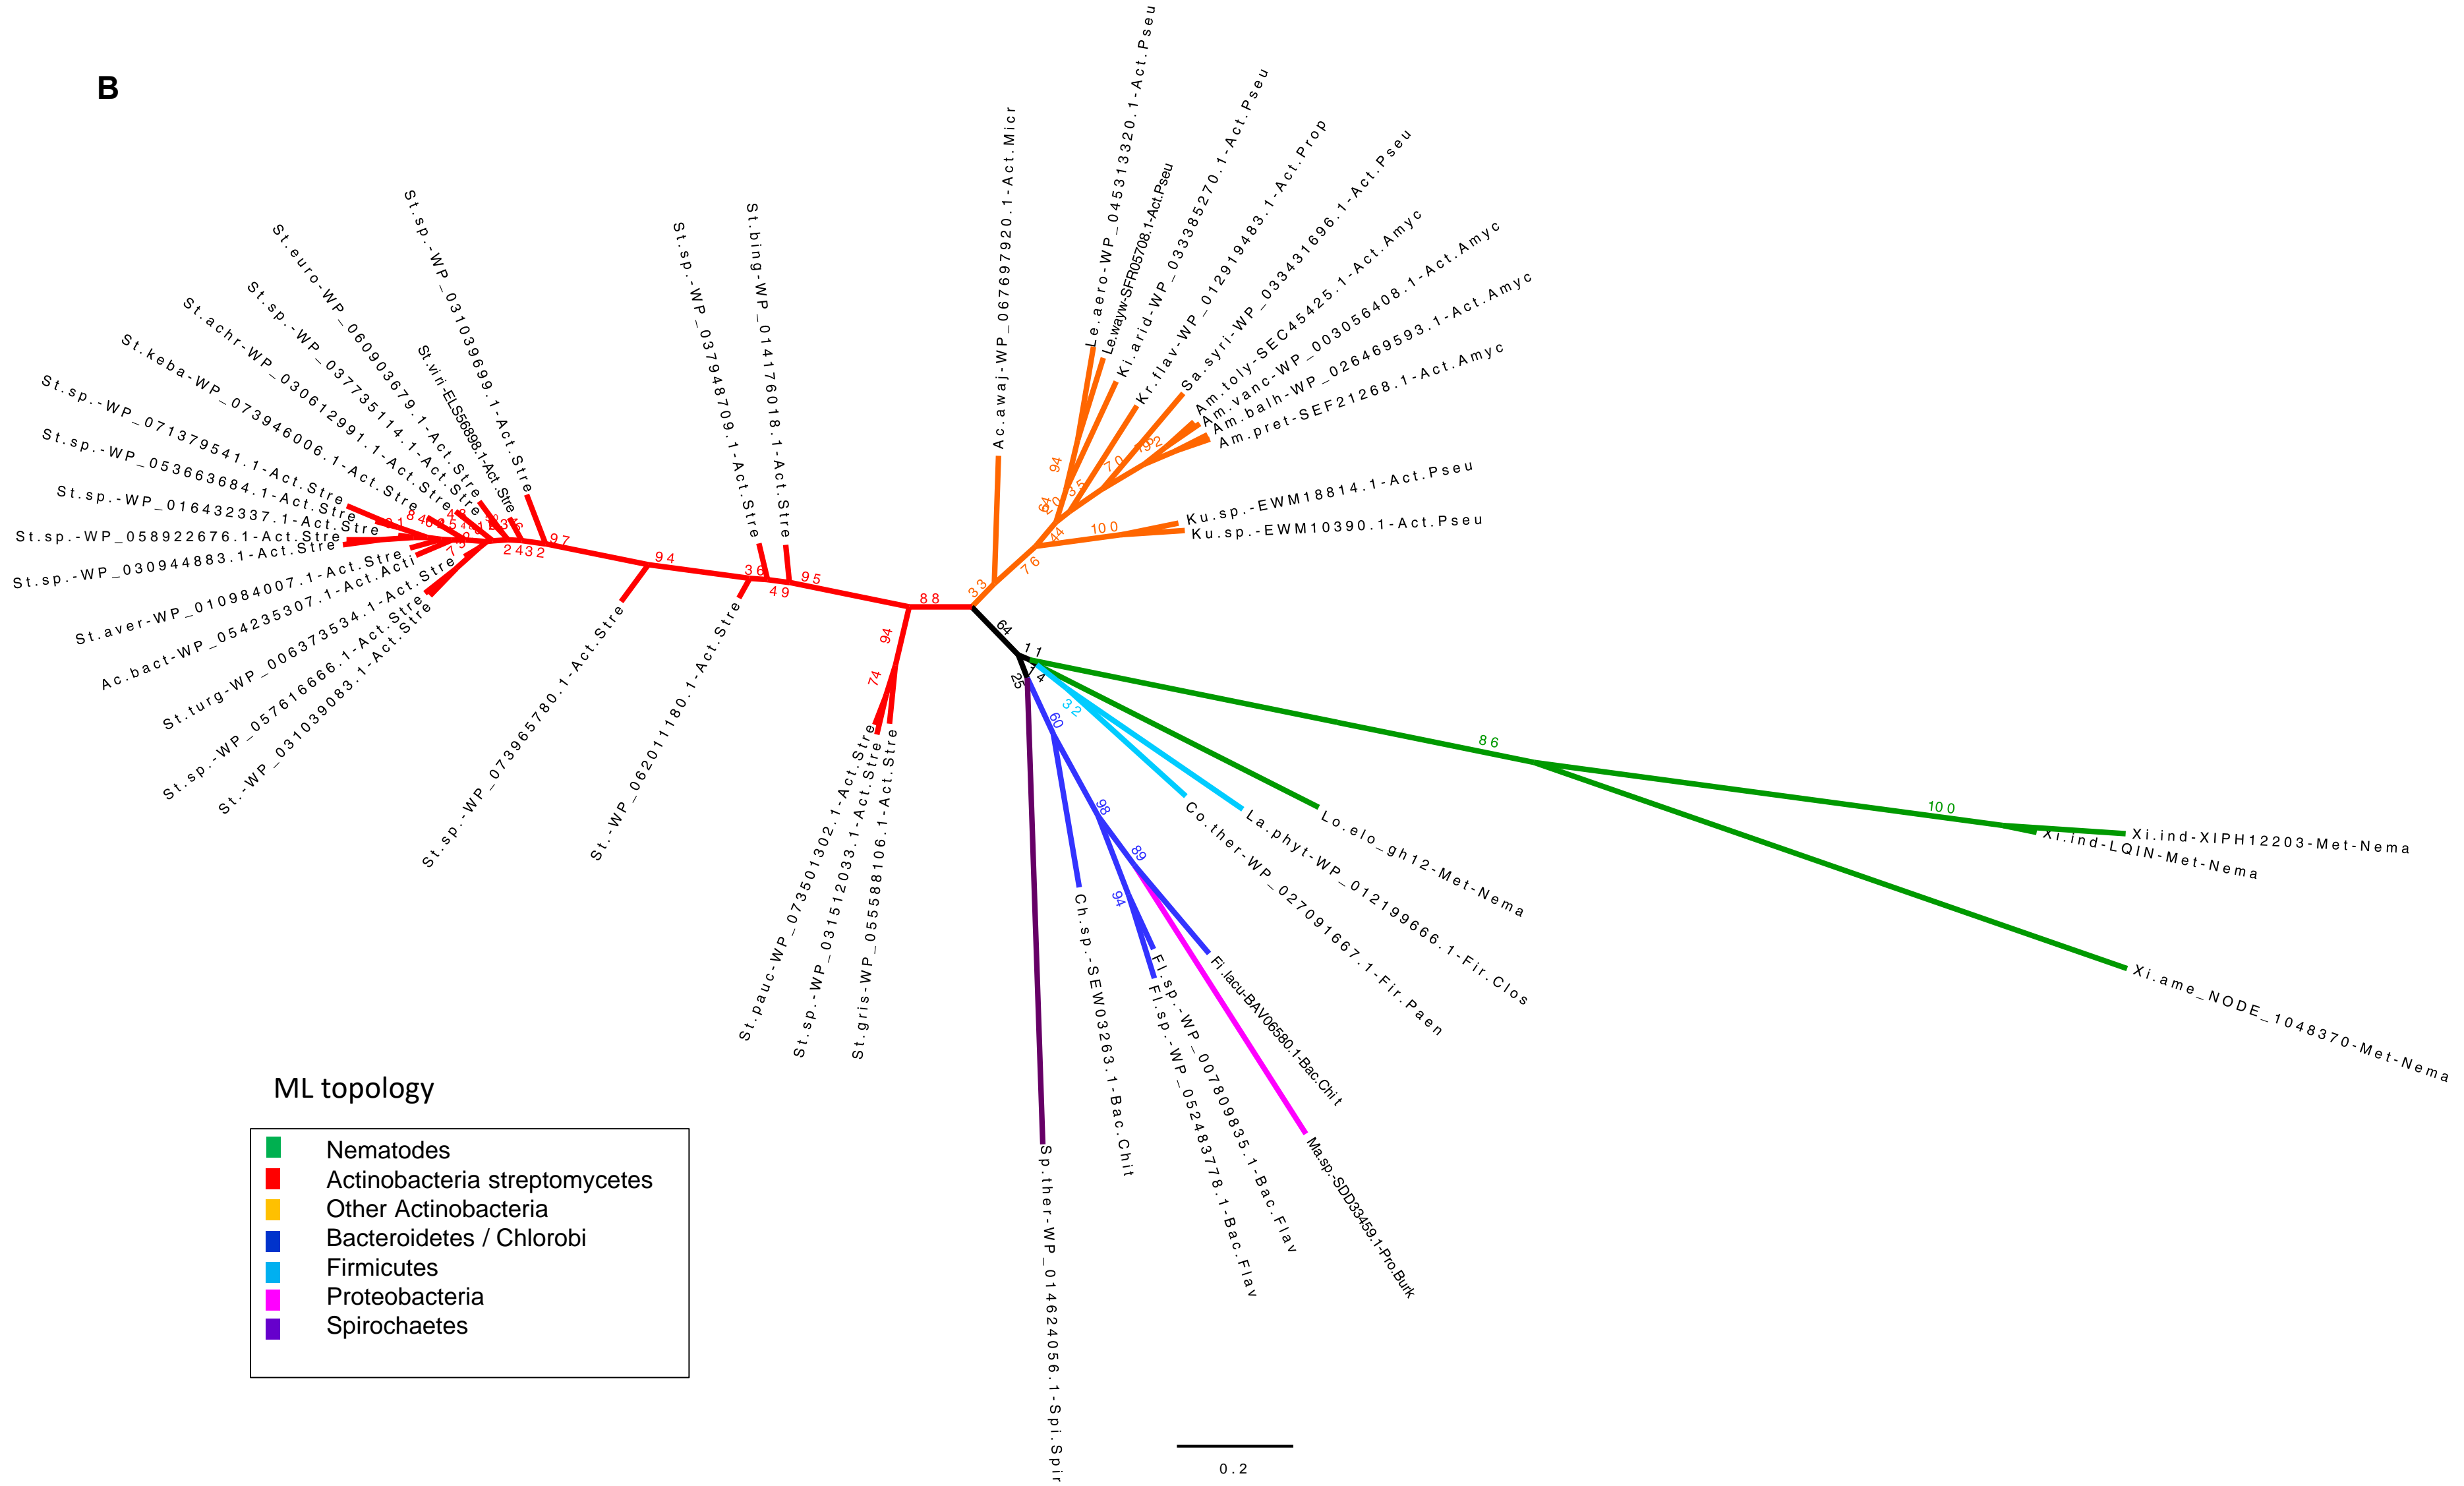

Supplement: s1 [file s1]

A

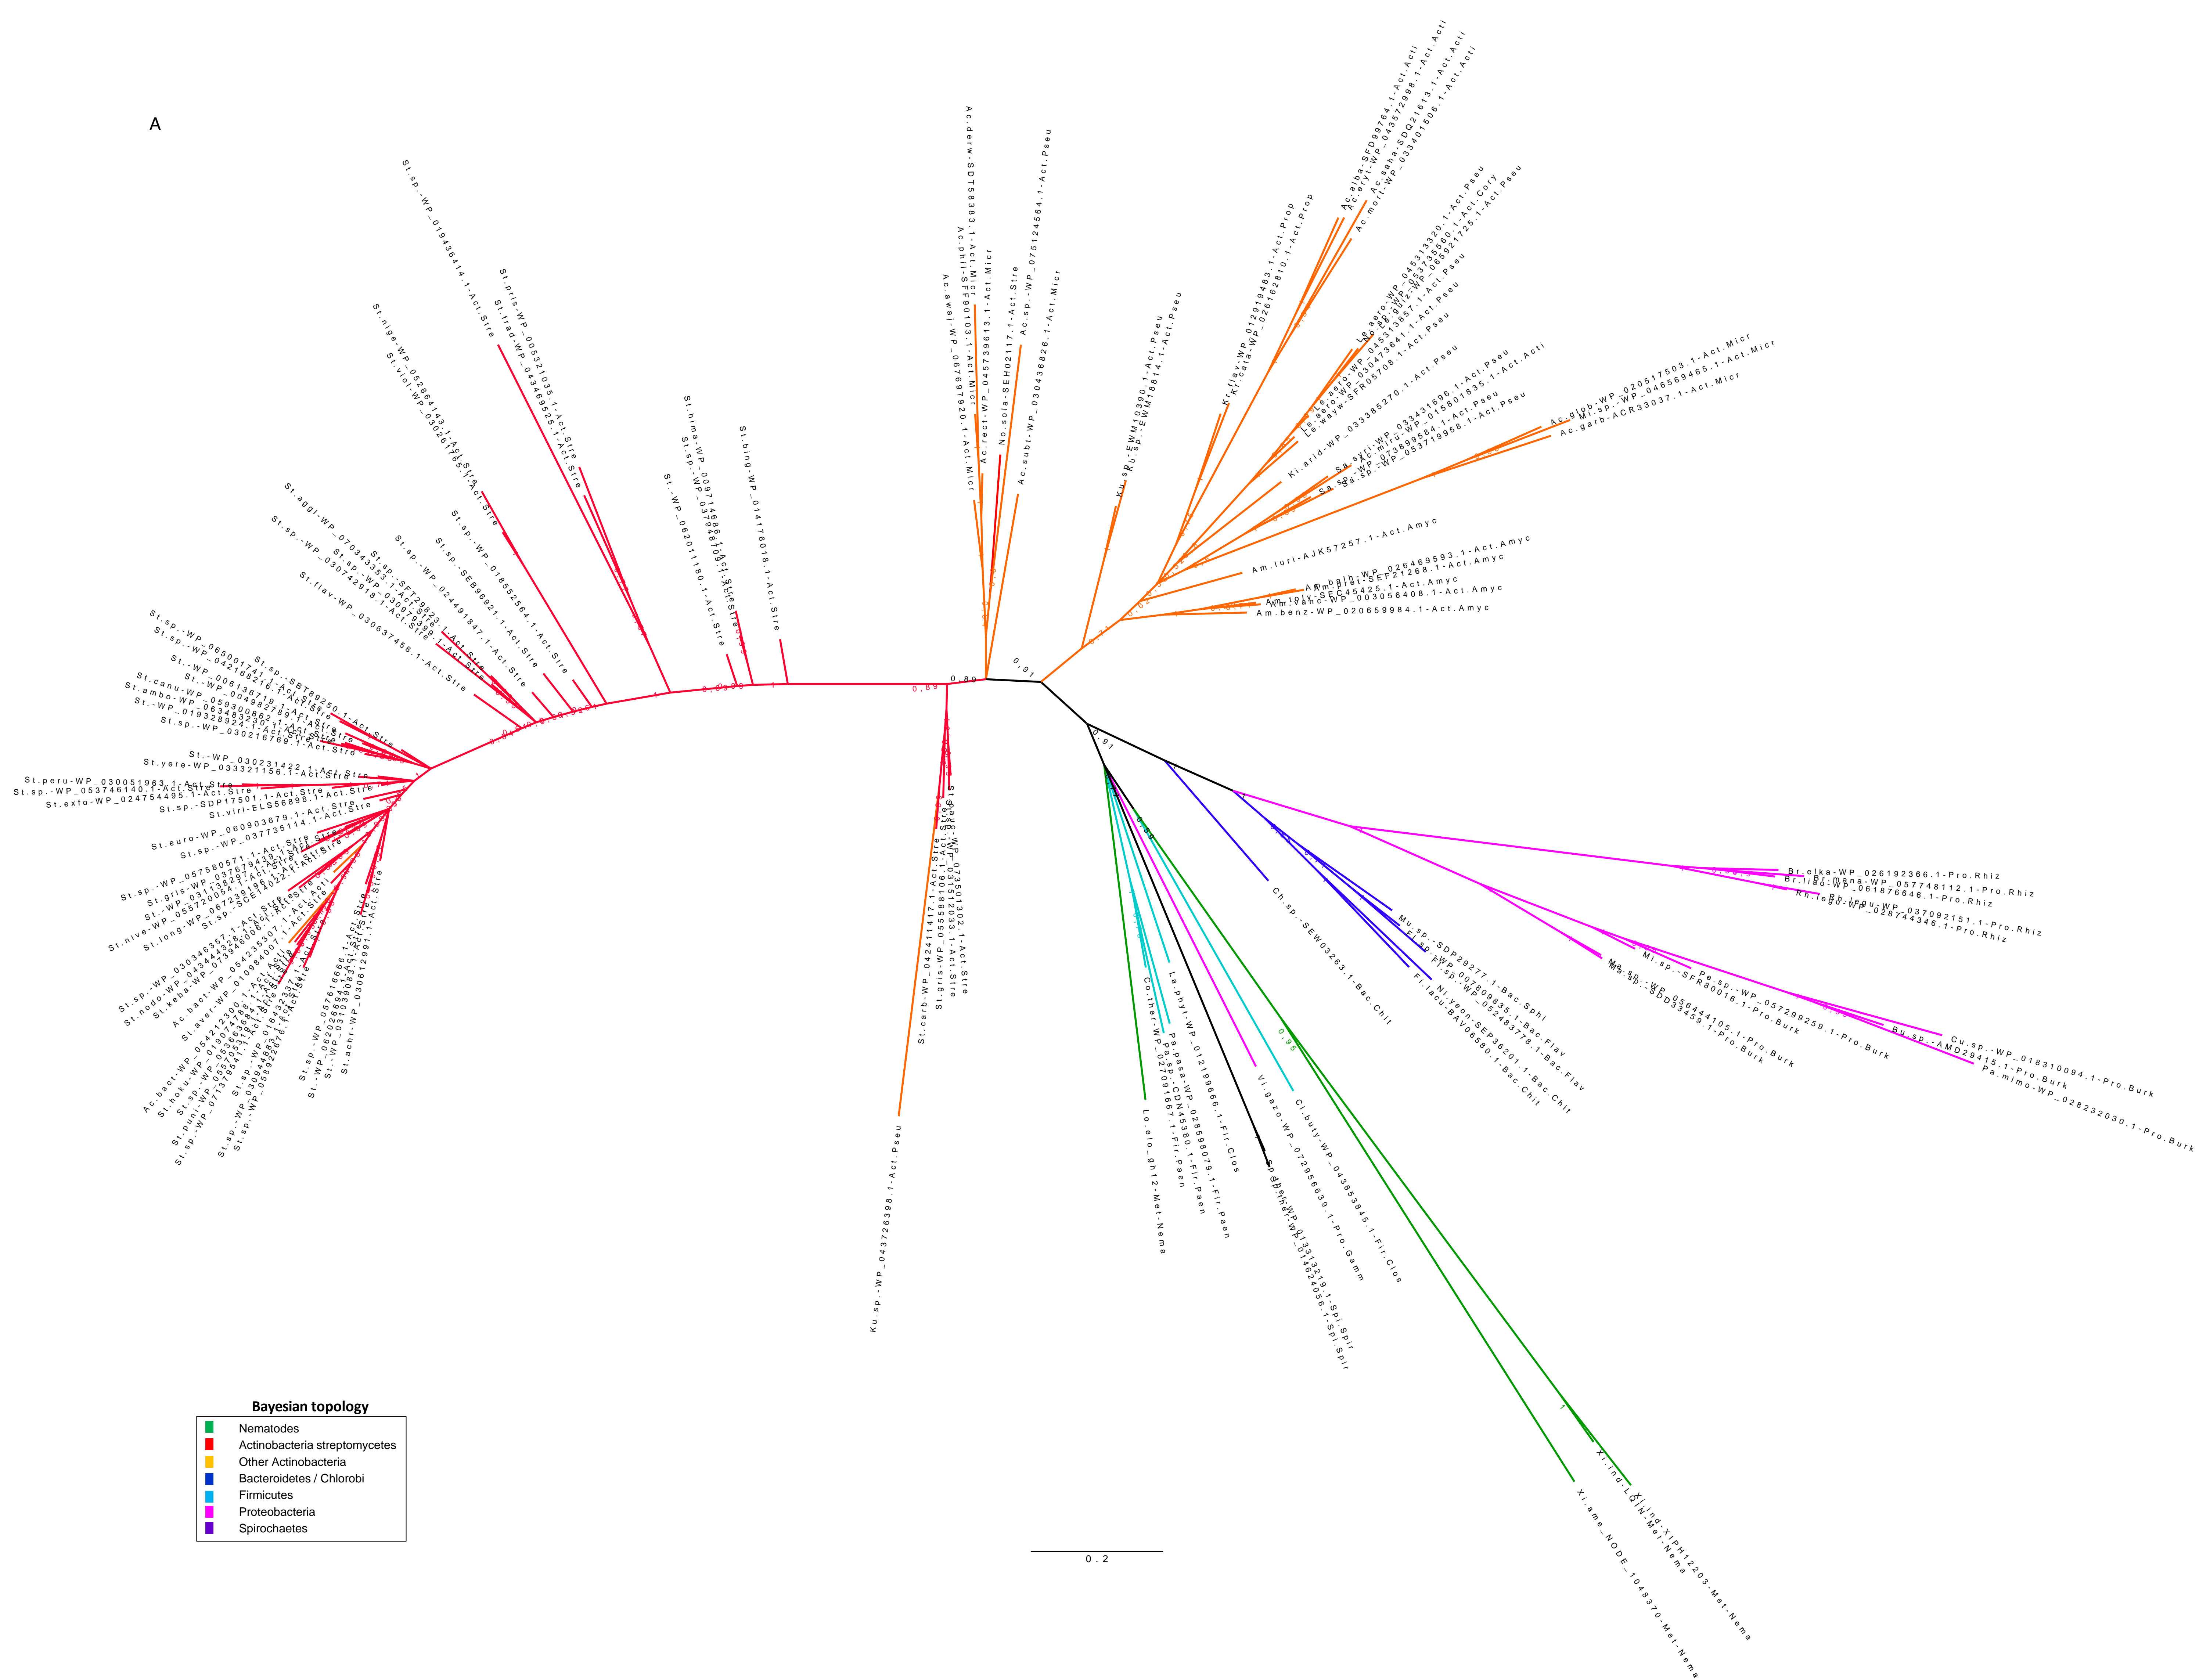



B

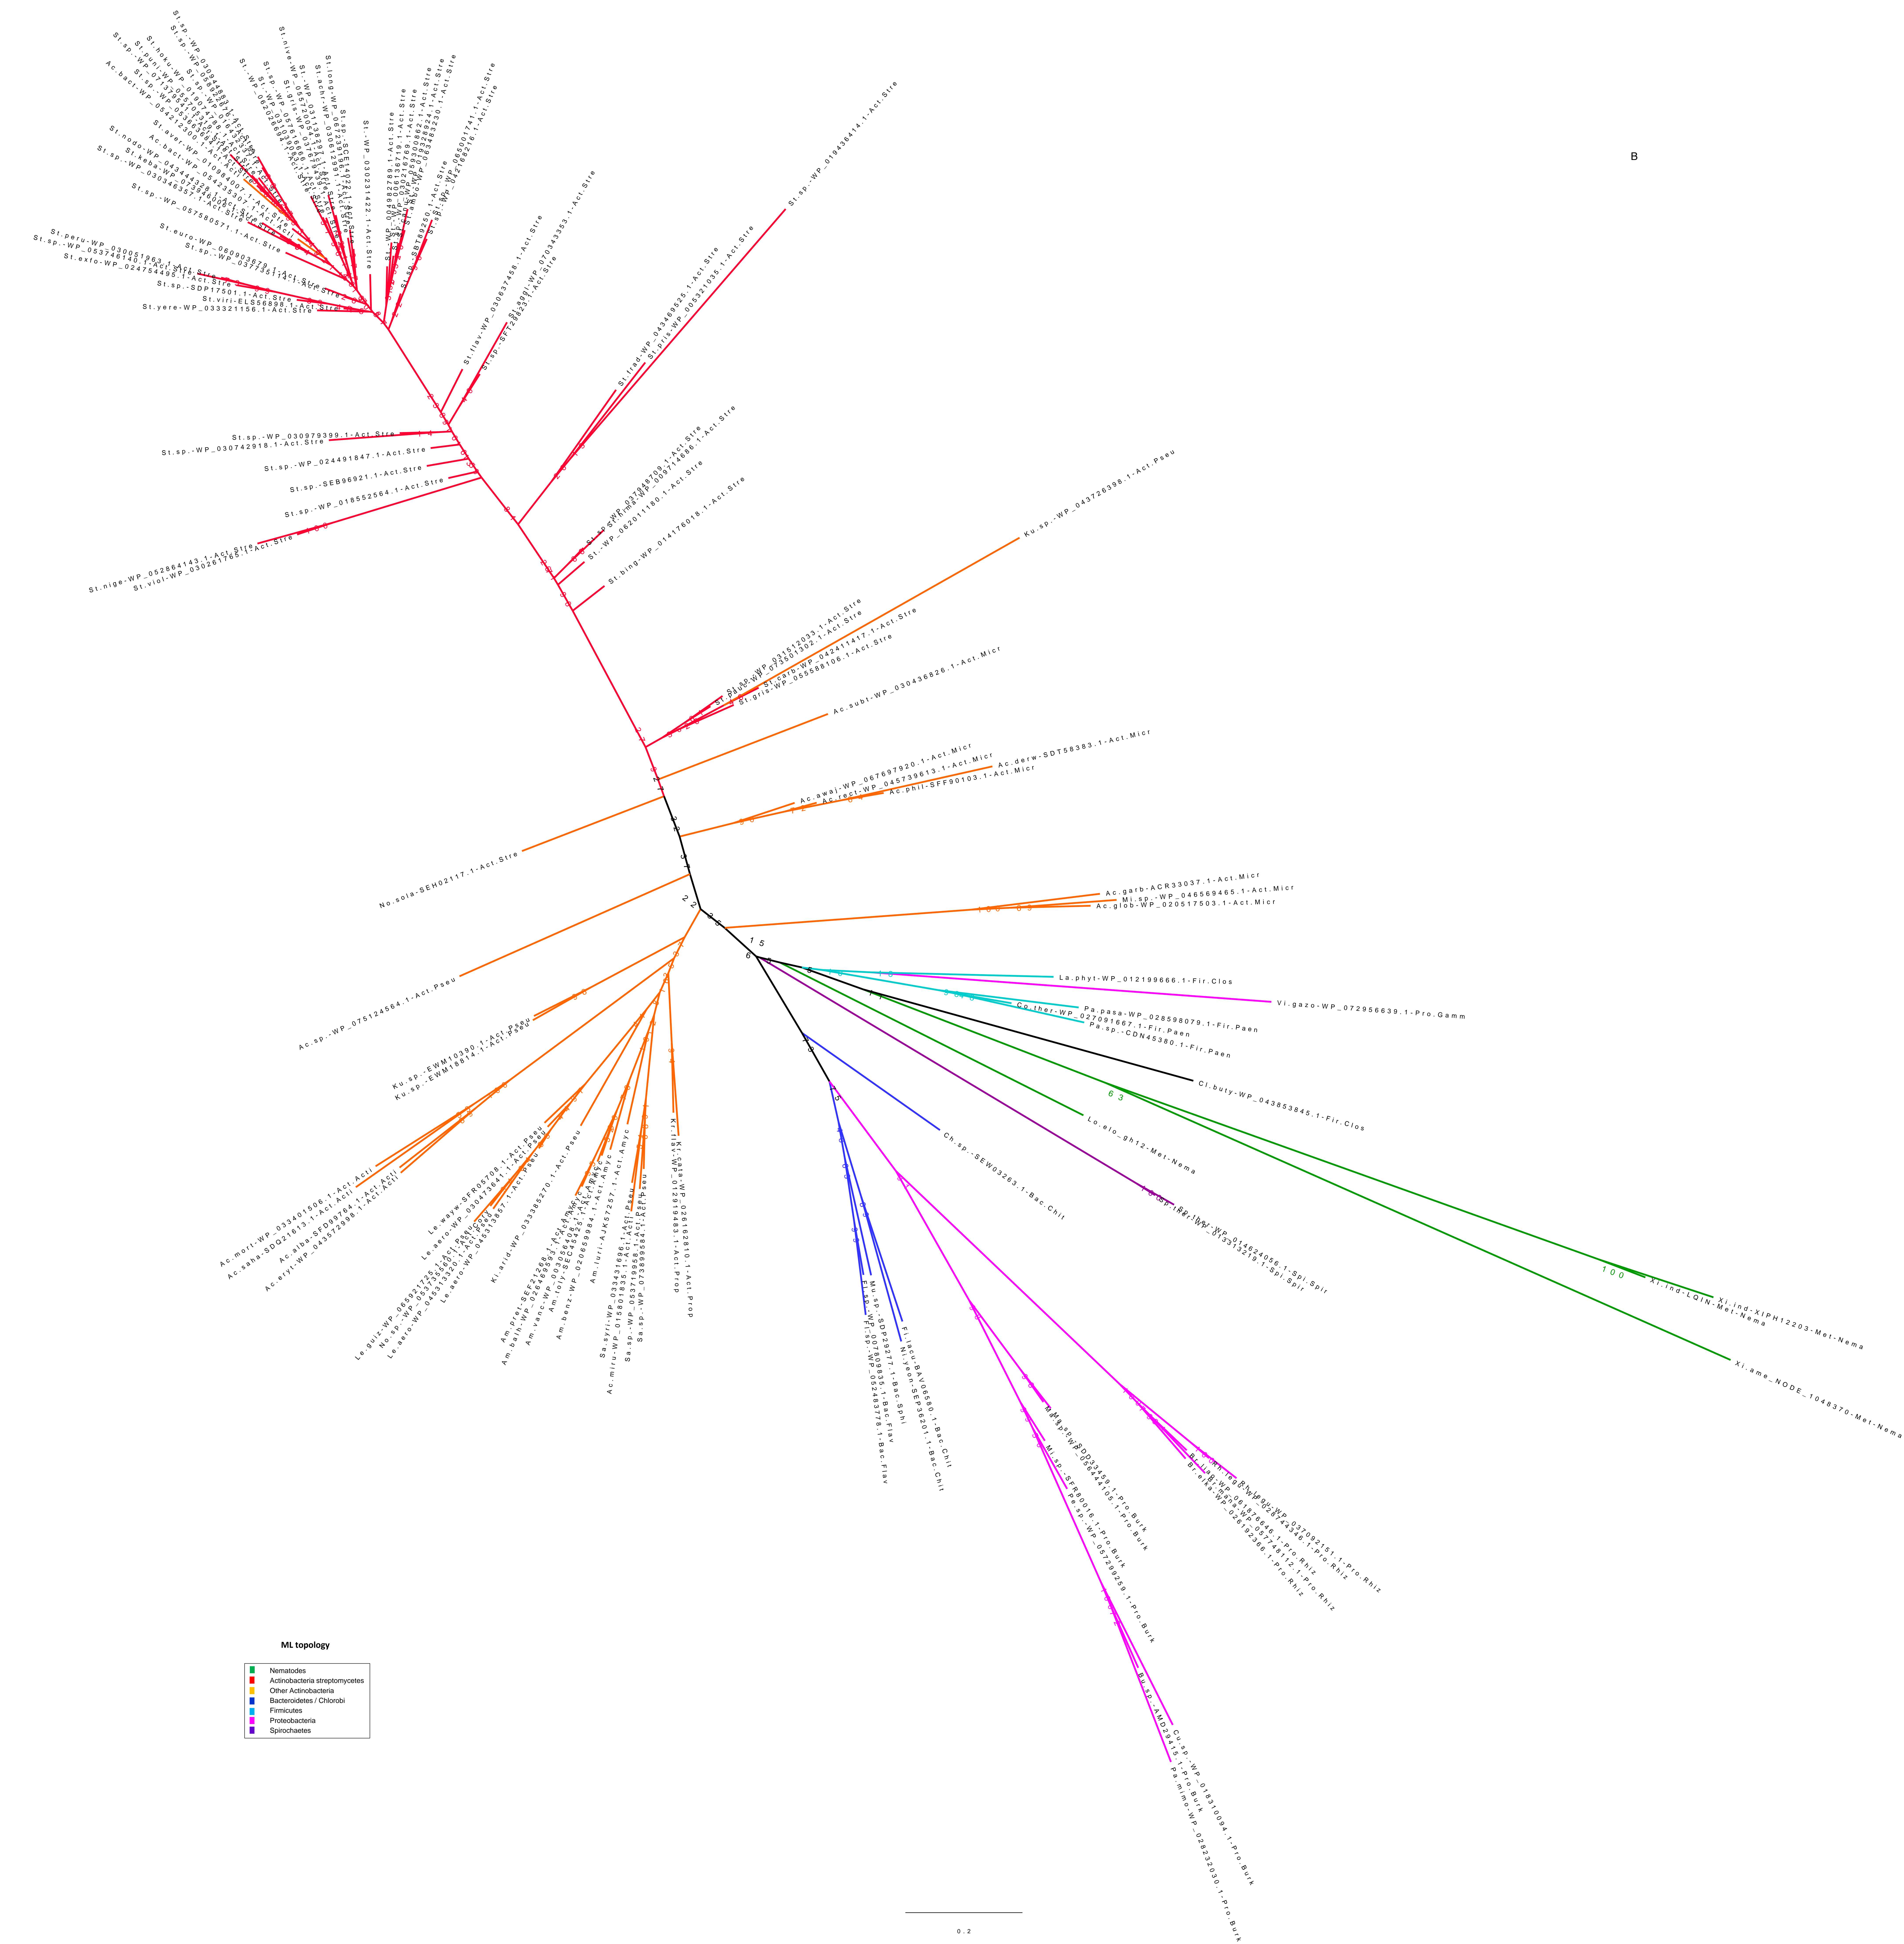

Supplement: s1 [file s1]
